# Supplementary material
Source: Springer Nature journal article supplement (https://www.springermedizin.de/resource/supplementary/13047_2013_749_MOESM1_ESM.pdf/9664210)

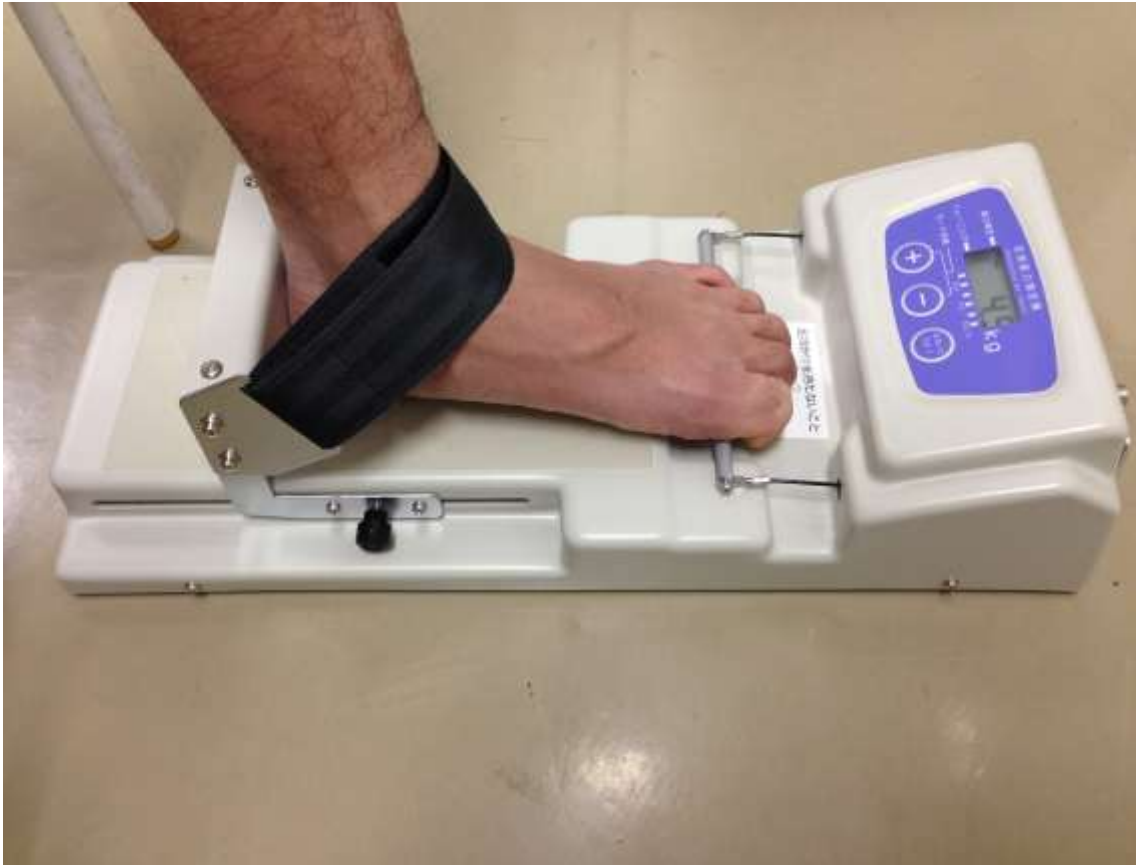

Supplement: MOESM1 [file 9664210]
